# Supplementary material for: The dependence of the β-to-α phase transition behavior of poly(1,4-butylene adipate) on phase separated morphology in its blends with poly(vinylidene fluoride)
Source: Royal Society of Chemistry journal article supplement (doi:10.1039/c8cp02464b), 2018-01-01
Supplement: c8cp02464b1.pdf [file c8cp02464b1.pdf]

The dependence of  $\beta$  to  $\alpha$  phase transition behavior of Poly(1,4-  
butylene adipate) on phase separated morphology in its blends with  
Poly(vinylidene fluoride)

Chunyue Hou,<sup>†</sup> Huihui Li,<sup>†</sup> Xiaoli Sun,<sup>\*†</sup> Shouke Yan,<sup>†,‡</sup> Yanfang Wang,<sup>§</sup> Shangtao  
Chen<sup>§</sup>

<sup>†</sup>*State Key Laboratory of Chemical Resource Engineering, Beijing University of Chemical  
Technology, Beijing 100029, China ([xiaolisun@mail.buct.edu.cn](mailto:xiaolisun@mail.buct.edu.cn))*

<sup>‡</sup>*Key Laboratory of Rubber-Plastics, Qingdao University of Science & Technology, Qingdao  
266042, China*

<sup>§</sup>*Petrochemical Research Institute, PetroChina, Beijing 100029, China*

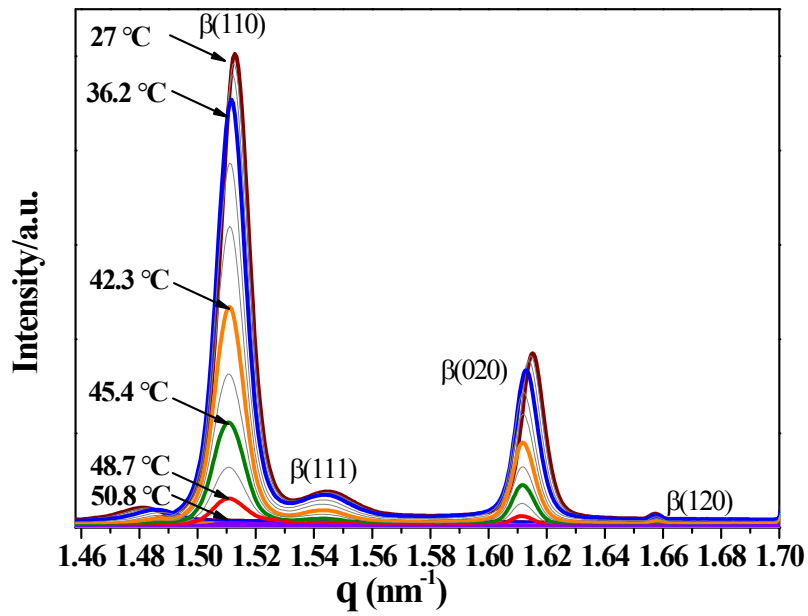

**Figure S1.** The WAXD measurement results obtained from the PBA sample at the heating rate of 10 °C/min.

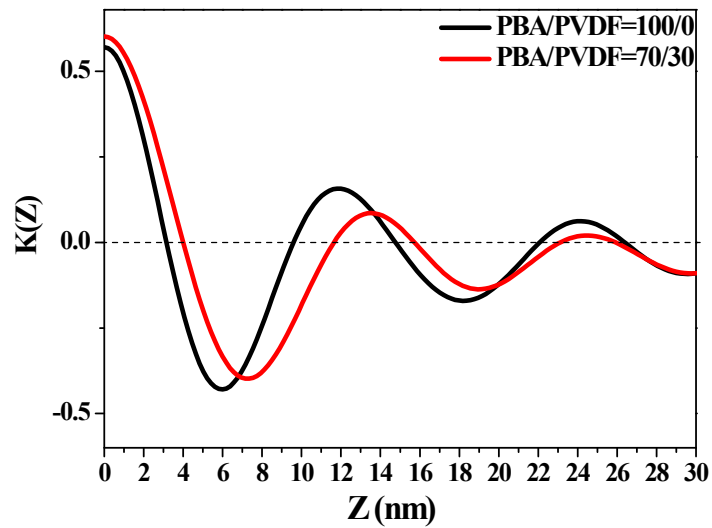

**Figure S2.** The plots of Stroble-Schneider's one dimensional correlation function of neat PBA and blend.

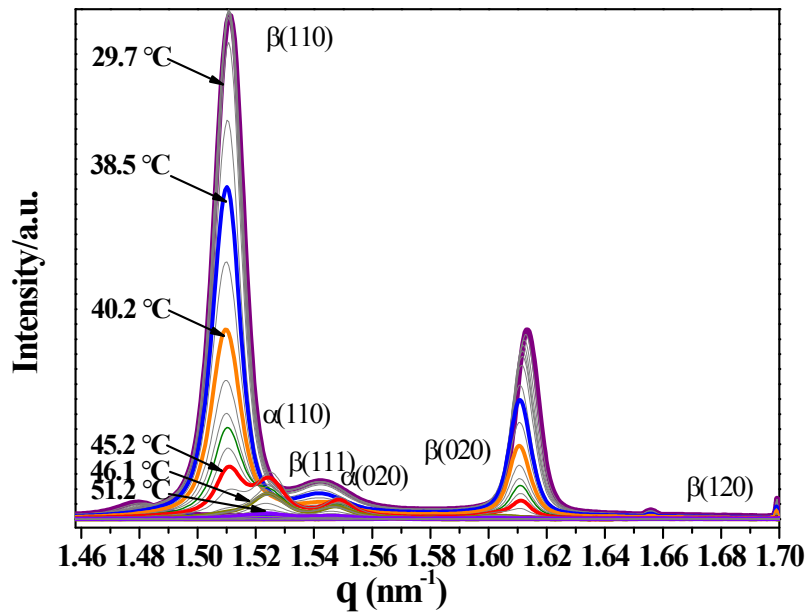

**Figure S3.** The WAXD measurement results obtained from the PBA sample at the heating rate of 1 °C/min.

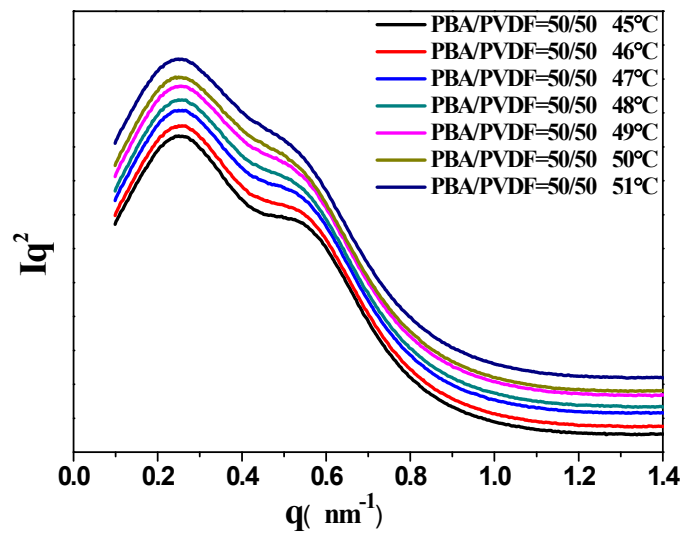

**Figure S4.** The Lorentz-corrected one-dimensional SAXS profiles of 50/50 PBA/PVDF blend from 45 °C to 51 °C.
